# Supplementary material for: Assessment of critical steps of a GC/MS based indirect analytical method for the determination of fatty acid esters of monochloropropanediols (MCPDEs) and of glycidol (GEs)
Source: PubMed Central journal article supplement (PMC5344965; doi:10.1016/j.foodcont.2017.01.024), 2017-07
Supplement: mmc1.pdf [file mmc1.pdf]

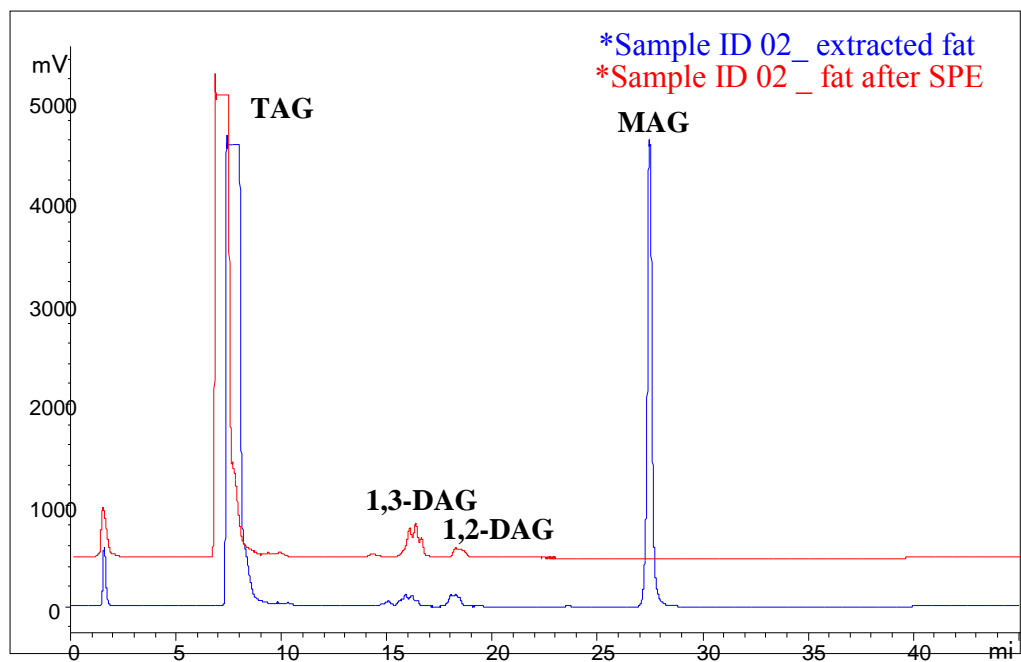

**Supplementary fig. 1** Acylglycerols composition of fat sample 02 (blue line) and fat sample 02 after clean-up by SPE (red line) analysed by HPLC/ELSD

Neat PBA  
(0.2 g)

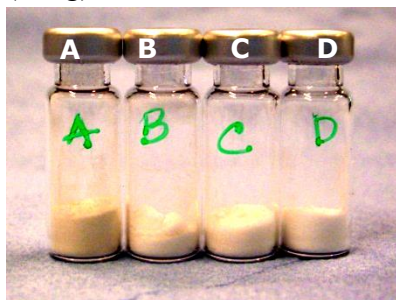

Acetone/water (1:2)  
(0.2 g/ 1.5 mL)

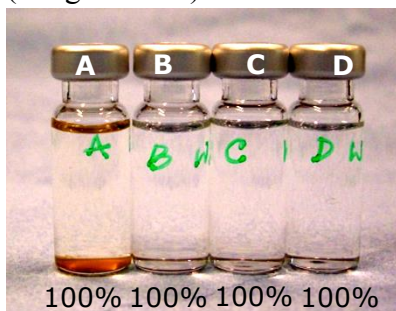

Diethyl ether  
(0.2 g/ 1.5 mL)

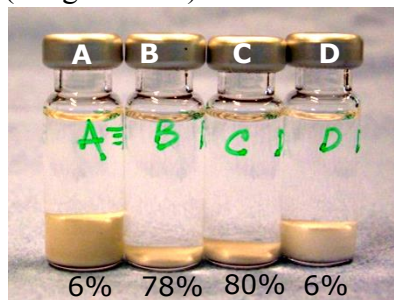

Acetone  
(0.2 g/ 1.5 mL)

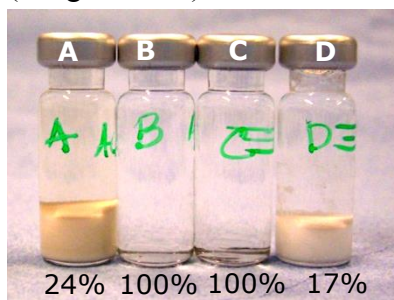

**Supplementary fig. 2** Solubility of commercial batches of PBA in different solvents (A,B,C = different batches of same producer sold under same product number, D = different producer)

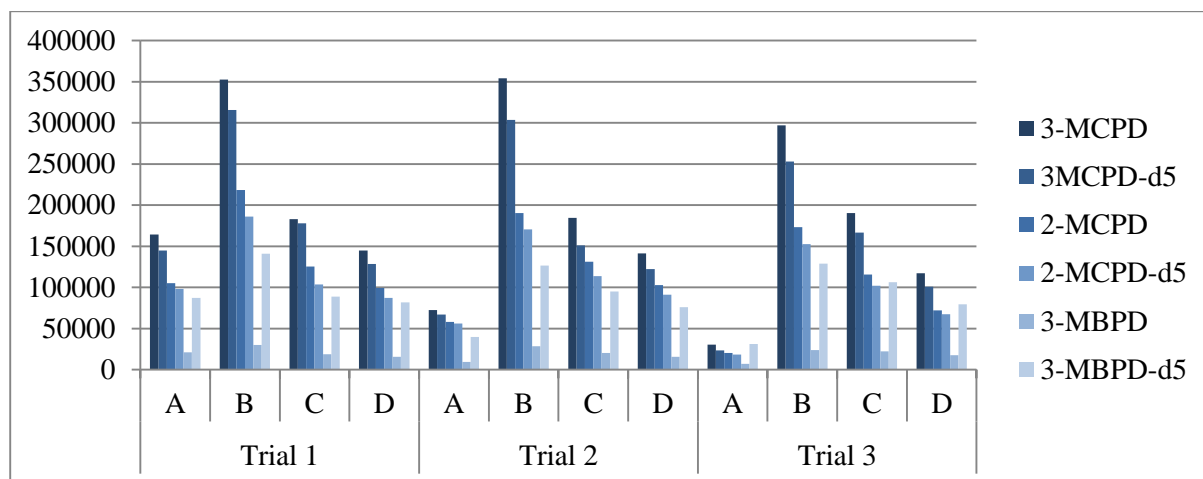

**Supplementary fig. 3** Influence of different PBA reagents on the response of target compounds after derivatization in organic medium (neat PBA dissolved in diethyl ether - A,B,C = different batches of same producer, D = different producer)
